# Supplementary material for: Tuning the structural stability and spin-glass behavior in α-MnO2nanotubes by Sn ion doping
Source: Royal Society of Chemistry journal article supplement (doi:10.1039/d1cp05459g), 2022-01-01
Supplement: d1cp05459g1.pdf [file d1cp05459g1.pdf]

## Supporting Information

### Tuning the structural stability and spin-glass behavior in the $\alpha$ -MnO<sub>2</sub> nanotubes by Sn ions doping

Xin Liu<sup>1,2,3\*</sup>, Yang Xie<sup>1,2</sup>, Zhiwei Hu<sup>4\*</sup>, Hong-Ji Lin<sup>5</sup>, Chien-Te Chen<sup>5</sup>, Liang Dong<sup>1,2</sup>,  
Yahui Zhang<sup>1,2,3</sup>, Qing wang<sup>1,2,3</sup> and Shao-Hua Luo<sup>1,2,3</sup>,

1 School of Material Science and Engineering, Northeastern University, 110819, Shenyang, China

2 School of Resources and Materials, Northeastern University at Qinhuangdao, Qinhuangdao,  
066004, China

3 Key Laboratory of Dielectric and Electrolyte Functional Material Hebei Province, Qinhuangdao,  
066004, China

4 Max-Planck Institute for Chemical Physics of Solids, Nöthnitzer Str.40, 01187 Dresden, Germany.

5 National Synchrotron Radiation Research Center, 101 Hsin-Ann Road, Hsinchu 30076, Taiwan.

Email: [liuxinnumber1@foxmail.com](mailto:liuxinnumber1@foxmail.com); [Zhiwei.hu@cpfs.mpg.de](mailto:Zhiwei.hu@cpfs.mpg.de)

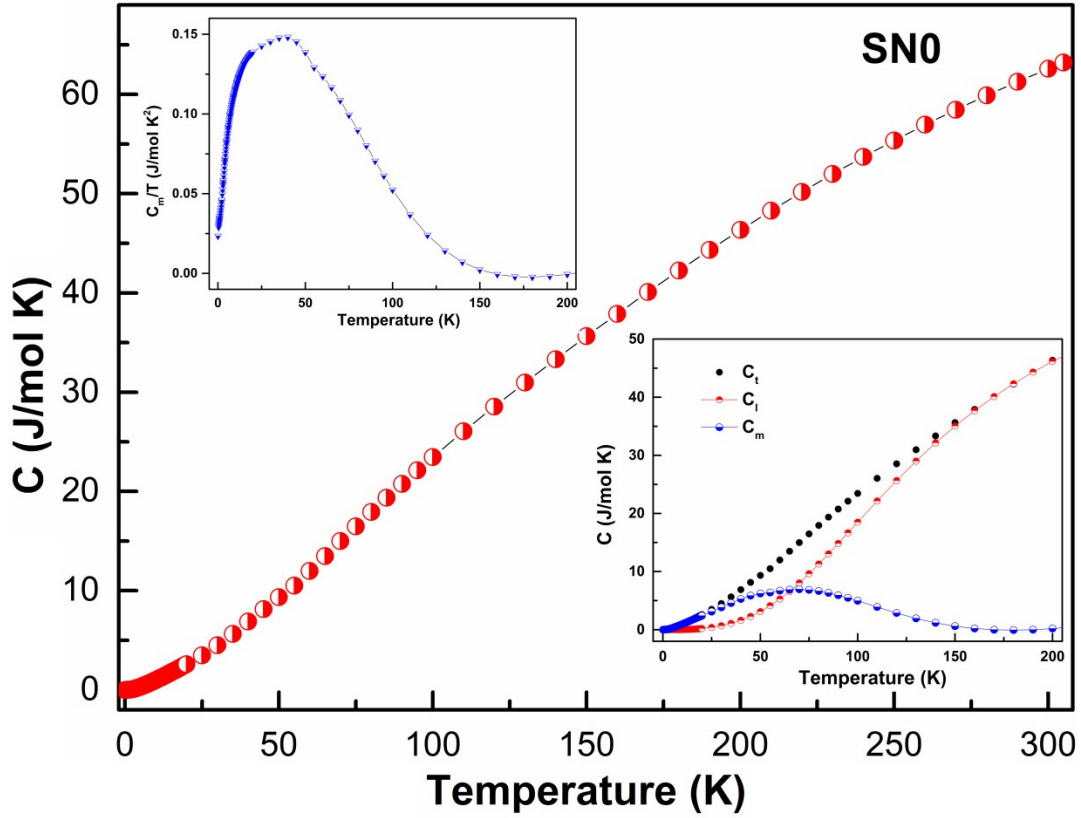

Figure S1. Temperature dependence of the specific heat in SN0

The measured specific heat ( $C_t$ ) in SN0 includes the contributions from the lattice specific ( $C_l$ ) and the magnetic specific heat ( $C_m$ ). We first fitted the high temperature range of the curve from 150 to 300 K, and determined the Debye temperature  $\theta_D = 561$  K. Then we calculated the lattice contribution  $C_l$  by the expression:

$$C_{m,p} = 9N_A k_B \frac{T^3}{\theta_D^3} \int_0^{\frac{\theta_D}{T}} \frac{x^4 e^x}{(e^x - 1)^2} dx$$

As shown in the lower right part of the Fig. S1. After subtracting the lattice contribution  $C_l$  from the  $C_t$ , we obtained the  $C_m$  contribution. The upper inset shows the magnetic specific heat plotted as  $C_m/T$  vs  $T$ .
